# Microbial diversity and metabolic potential in cyanotoxin producing cyanobacterial mats throughout a river network

Keith Bouma-Gregson<sup>1,3</sup>, Matthew R. Olm<sup>2</sup>, Alexander J. Probst<sup>3^</sup>, Karthik Anantharaman<sup>3\*</sup>, Mary E. Power<sup>1</sup>, Jillian F. Banfield<sup>3,4,5</sup>

<sup>1</sup>Department of Integrative Biology, University of California, Berkeley, CA, USA

<sup>2</sup>Department of Plant and Microbial Biology, University of California, Berkeley, CA, USA

<sup>3</sup>Department of Earth and Planetary Science, University of California, Berkeley, CA, USA

<sup>4</sup>Department of Environmental Science, Policy, and Management, University of California, Berkeley, CA, USA

<sup>5</sup>Earth Sciences Division, Lawrence Berkeley National Laboratory, Berkeley, CA, USA

<sup>^</sup>Current Address: Group for Aquatic Microbial Ecology, Biofilm Center, Department for Chemistry, University of Duisburg-Essen, Essen, Germany

<sup>\*</sup>Current Address: Department of Bacteriology, University of Wisconsin, Madison, WI, USA

## Corresponding author:

Jillian F. Banfield,  
Energy Biosciences Building  
2151 Berkeley Way  
Berkeley, CA 94720-5230  
510-643-2155  
jbanfield@berkeley.edu

## Abstract

Microbial mats formed by Cyanobacteria of the genus *Phormidium* produce the neurotoxin anatoxin-a that has been linked to animal deaths. Blooms of planktonic Cyanobacteria have long been of concern in lakes, but recognition of potential harmful impacts of riverine benthic cyanobacterial mats is more recent. Consequently little is known about the diversity of the biosynthetic capacities of cyanobacterial species and associated microbes in mats throughout river networks. Here we performed metagenomic sequencing for 22 *Phormidium*-dominated microbial mats collected across the Eel River network in Northern California to investigate cyanobacterial and co-occurring microbial assemblage diversity, probe their metabolic potential and evaluate their capacities for toxin production. We genomically defined four Cyanobacterial species clusters that occur throughout the river network, three of which have not been described previously. From the genomes of seven strains from one species group we describe the first anatoxin-a operon from the genus *Phormidium*. Community composition within the mat appears to be associated with the presence of Cyanobacteria capable of producing anatoxin-a. Bacteroidetes, Proteobacteria, and novel Verrucomicrobia dominated the microbial assemblages. Interestingly, some mats also contained organisms from candidate phyla such as *Candidatus* Kapabacteria, as well as Absconditabacteria (SR1), Parcubacteria (OD1) and Peregrinibacteria (PER) within the Candidate Phyla Radiation. Oxygenic photosynthesis and carbon respiration were the most common metabolisms detected in mats but other metabolic capacities include aerobic anoxygenic photosynthesis, sulfur compound oxidation and breakdown of urea. The results reveal the diversity of metabolisms fueling the growth of mats, and a relationship between microbial assemblage composition and the distribution of anatoxin-a producing cyanobacteria within freshwater *Phormidium* mats in river networks.

## Introduction

When Cyanobacteria proliferate in freshwater environments, the production of toxins can threaten water quality and public health (Paerl and Otten, 2013). Harmful cyanobacterial blooms in lakes have been described for decades (Francis, 1878). In rivers, however, research on toxigenic benthic cyanobacterial mats is relatively recent (Quiblier *et al.*, 2013). Nevertheless, nuisance benthic cyanobacterial mats in rivers have already been documented across the globe, including New Zealand (McAllister *et al.*, 2016), California (Fetscher *et al.*, 2015; Bouma-Gregson *et al.*, 2017), France (Gugger *et al.*, 2005), and Spain (Cantoral Uriza *et al.*, 2017). Benthic mats are often formed by filamentous genera such as *Anabaena*, *Phormidium*, *Nodularia*, *Lyngbya*, or *Oscillatoria*, and are able to produce cyanotoxins such as anatoxin-a, microcystins, and lyngbyatoxin (Quiblier *et al.*, 2013). Given predictions of increasing cyanobacterial blooms in lakes and estuaries due to eutrophication and warming (Paerl and Huisman, 2009; Rigosi *et al.*, 2014), a better understanding of riverine benthic cyanobacterial mats is needed to anticipate environmental and ecological factors that may stimulate toxigenic benthic cyanobacterial blooms in rivers.

Heterotrophic bacteria often grow attached to, or in close proximity, to cyanobacterial filaments in benthic mats, exchanging nutrients and carbon (Paerl, 1996; Xie *et al.*, 2016). Cyanobacterial growth rates and other physiological processes are often enhanced in the presence of co-occurring microbes (Allen, 1952), and few antagonisms between cyanobacteria and other bacteria have been reported (Paerl, 1996; Berg *et al.*, 2009). The microbial assemblage of lakes shifts when cyanobacteria bloom (Woodhouse *et al.*, 2016; Tromas *et al.*, 2017), and the assemblage composition differs depending on the cyanobacterial species causing the bloom (Louati *et al.*, 2015; Bagatini *et al.*, 2014). With most interactions among Cyanobacteria and co-occurring bacteria facilitating cyanobacterial growth, identifying the diversity and metabolisms of the whole microbial consortia within toxigenic cyanobacterial mats is central to understanding the ecological processes that drive the proliferation of toxigenic mats in rivers.

Little is known about the microbial consortia associated with freshwater toxigenic cyanobacterial mats in rivers. We know of only one published study on this topic, which documented shifts over time in the microbial assemblages of *Phormidium* mats (Oscillatoriales) in New Zealand rivers (Brasell *et al.*, 2015). Proteobacteria were abundant in these assemblages, including taxa known to produce alkaline phosphatase, which may be important for mat growth in these phosphorus-limited New Zealand rivers (Wood *et al.*, 2015; McAllister *et al.*, 2016; Wood *et al.*, 2017). The New Zealand mats were profiled using 16S rRNA gene amplicons surveys (Brasell *et al.*, 2015), a method that cannot provide specific information about metabolic functions or metabolites.

Cyanobacterial mats occur each summer in the Eel River in Northern California (Figure 1). The mats are formed by filamentous cyanobacterial taxa such as *Phormidium* (Oscillatoriales) and *Anabaena* (Nostocales) and produce cyanotoxins, especially anatoxin-

a (Puschner *et al.*, 2008; Bouma-Gregson *et al.*, 2017). Anatoxin-a is a neurotoxic alkaloid that inhibits neuromuscular receptors by disrupting cellular ion channels, which causes muscle failure and can lead to death (Devlin and Edwards, 1977; Carmichael *et al.*, 1979). Anatoxin-a synthesis starts from proline, a cyclic amino acid, which is transformed by an eight-gene (*anaA-H*) polyketide synthase (PKS) operon (Méjean *et al.*, 2010, 2014; Cadel-Six *et al.*, 2009). Not all strains within anatoxin-a producing species contain the anatoxin-a gene operon, and variation between toxin and non-toxin producing strains occurs over small spatial scales (<1 cm) (Wood *et al.*, 2012; Wood and Puddick, 2017). Concentrations of anatoxin-a can be driven by changes in the abundance of toxin-producing genotypes within a mat, rather than differential toxin production per cell (Wood and Puddick, 2017).

In spite of their important ecological and public health impacts, few toxin-producing cyanobacterial genomes have been sequenced (Shih *et al.*, 2013; Brown *et al.*, 2016; Pancrace *et al.*, 2017). Currently, there have been no culture-independent genome-resolved investigations of toxigenic freshwater cyanobacterial mats, which can provide high-resolution information about taxonomic diversity and provide direct insight into the metabolic potential of microbes. Using genome-resolved metagenomics, we studied *Phormidium*-dominated mats across the Eel River watershed to 1) identify the diversity of toxin-producing *Phormidium*, 2) document the diversity of non-cyanobacterial taxa associated with the *Phormidium* mats, 3) describe the anatoxin-a gene operon of *Phormidium* within the watershed, and 4) identify different metabolic potential of Bacteria present in mats.

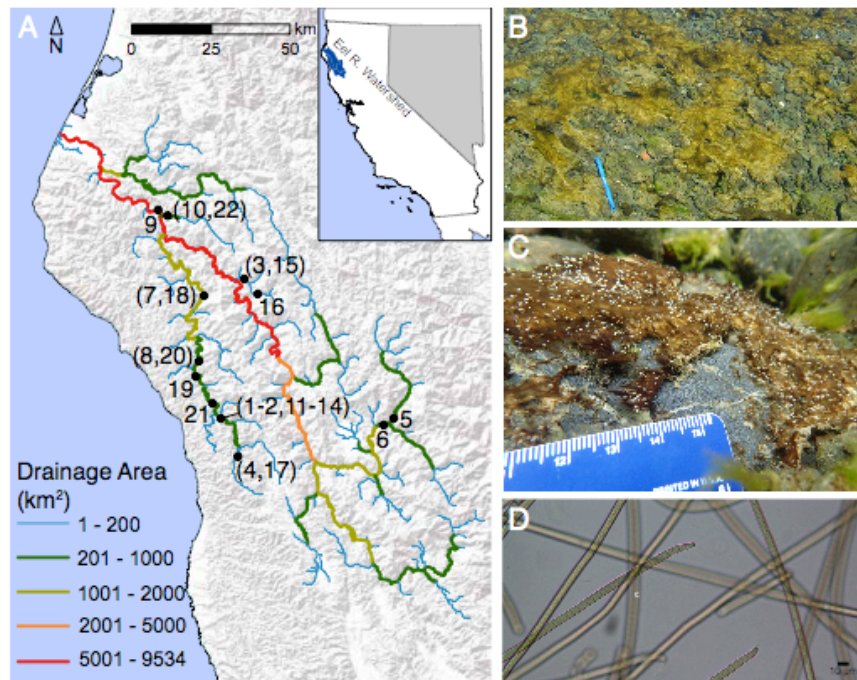

**Figure 1** A) Map of Eel River watershed showing location of 22 samples collected in the Eel River watershed in August 2015. B) *Phormidium* mats in the Eel River. C) Underwater photograph showing *Phormidium* mat on a cobble. D) Micrograph of *Phormidium* trichomes (400x).

## Materials and methods

### *Sample collection*

Samples were collected from *Phormidium* (Oscillatoriales) mats over 3 weeks in August 2015 in the Eel River watershed in California (Figure 1). The upstream drainage areas at sites ranged from 17 km<sup>2</sup> to 7908 km<sup>2</sup>. *Phormidium* mats were identified macroscopically by their brown, orange-olive, or maroon coloration and epilithic growth. *Phormidium* mats are usually found in riffles, and all samples were collected from water 5-70 cm deep with surface flows of 5-100 cm s<sup>-1</sup>. Microscopic identification confirmed that the mats are dominated by *Phormidium* (Figure 1). At each site, a cobble covered by a *Phormidium* mat was lifted from the river and placed in a tray that had been cleaned using a 70% ethanol solution. Using sterile forceps, ~0.5 g of biomass was sampled from the mat and placed in a sterile 2 ml cryotube. Samples were immediately flash-frozen by filling a Styrofoam cooler with 2 L of ethanol and then adding ~250 ml of dry ice to rapidly lower the temperature. Cryotubes were immediately placed in a plastic bag and submerged in the ethanol for 2 minutes. Then cryotubes were stored on dry ice until placed at -80°C upon returning to the laboratory. When enough *Phormidium* biomass could be located at a site, an upstream and downstream sample was collected about 30-50 meters apart from each other. In total, 22 samples were analyzed from 13 sites (Figure 1).

Several environmental parameters were measured at each site: total dissolved nitrogen and phosphorus, nitrate, ammonium, depth, surface flow velocity, canopy cover, conductivity, temperature, dissolved oxygen, alkalinity, and pH (collection and analysis details in supplementary methods). The relationship of samples based on environmental variables was analyzed with principal components analysis using the vegan package (Oksanen *et al.*, 2017) in R v. 3.4.2 (R Core Team, 2017). After a mat sample was collected for DNA extraction, ~1 g of cyanobacterial mat remaining was collected to measure anatoxin-a using liquid-chromatography mass spectrometry (LC-MS) (details in supplementary methods).

### *DNA extraction and sequencing*

DNA was extracted from samples using a MoBio (Carlsbad, CA, USA) DNeasy PowerBiofilm kit. Frozen cyanobacterial mat samples were thawed at room temperature for 0.5 h, and approximately 0.15 g of mat removed for DNA extraction. The DNA extraction followed manufacturer's protocol, except the cell lysis step in the protocol was modified to 5 minutes of bead beating and submersion for 30 minutes in a 65°C water bath. DNA was eluted into double distilled H<sub>2</sub>O, and sequenced on an Illumina (San Diego, CA, USA) HiSeq 4000 with 150 bp paired-end reads at the QB3 Genomics Sequencing Laboratory (<http://qb3.berkeley.edu/gsl/>, Berkeley, CA, USA).

### *Metagenome assemblies, binning, and analyses*

Reads were filtered to remove Illumina adapters and contaminants with BBtools then trimmed with SICKLE (<https://github.com/najoshi/sickle>) using default parameters. Assembly and scaffolding was performed by IDBA\_UD (Peng et al., 2012). For assembled scaffolds longer than 1 kbp, protein-coding genes were predicted with Prodigal in the meta-mode (Hyatt et al., 2010). Predicted genes were then annotated against KEGG (Kanehisa et al., 2014), UniRef100 (Suzek et al., 2007), and UniProt using USEARCH (Edgar, 2010). Genomes were binned manually using coverage, GC content, single copy genes, and taxonomic profile with ggKbase ([ggkbase.berkeley.edu](http://ggkbase.berkeley.edu)), as described in Raveh-Sadka et al. (2015). Raw sequence data and assembled *Phormidium* genomes have been deposited to NCBI under BioProject number PRJNA448579.

The taxonomic composition of the microbial assemblage in samples was investigated using the ribosomal protein S3 (rpS3) gene, and average nucleotide identity (ANI) used to investigate diversity of *Phormidium* genomes (details in supplementary methods). In genomes >70% complete and with <10% contamination, according to CheckM (Parks et al., 2015), genes for different metabolisms, phosphorus cycling, and anatoxin-a biosynthesis were predicted using the annotation process described above, as well as hidden Markov-models and read mapping (details in supplementary methods).

## Results

### *Environmental conditions*

At the collection sites, temperatures ranged from 17-26°C and maximum dissolved nitrogen and phosphorus concentrations were <100 and <30  $\mu\text{g L}^{-1}$ , respectively (Table S3). From the principal component analysis (PCA) on the environmental variables, the first two axes explain 60.7% of the environmental variation among the sites. Canopy cover and temperature were negatively correlated and explain much of the variation in environmental conditions at each site along PCA axis 1 (Figure S1). The second PCA axis describes variation in nitrogen, pH, and dissolved oxygen.

### *Microbial assemblage diversity*

The most abundant organisms in microbial assemblages belonged to Cyanobacteria (18 rpS3 clusters), Bacteroidetes (97 rpS3 clusters), Proteobacteria (77 rpS3 clusters), and Verrucomicrobia (8 rpS3 clusters). Minor members of the community included bacteria from Actinobacteria, Deinococcus-Thermus, Chloroflexi, *Candidatus* Kapabacteria and three Candidate Phyla Radiation groups (CPR; Figure S2). The genomic dataset for each sample included a relatively unique set of rpS3 sequence clusters, resulting in low species overlap (high beta diversity) among the sites with mean and median  $\beta_{\text{sim}}$  values of 0.73 and 0.8. Additionally, 25% of pairwise comparisons among sites had  $\beta_{\text{sim}}$  values of 1, indicating no shared rpS3 clusters among the samples. No single rpS3 cluster was detected in all samples.

Based on the relative abundance of rpS3 clusters, Cyanobacteria were the most abundant organisms in all samples, comprising 62-98% of the relative abundance within each sample (Figure 2A and Figure S3). The most common cyanobacterial rpS3 clusters were rpS3 66, 85, 152, and 244. These formed a clade with *Oscillatoria nigro-viridis* and *Microcoleus vaginatus* FGP-2 (Figure S2), but not with any reference *Phormidium* rpS3 sequences (Figure S2). (Few *Phormidium* rpS3 reference sequences are available, and the designations of the genera *Oscillatoria*, *Microcoleus*, and *Phormidium* are under revision (Strunecký *et al.*, 2013; Komárek, 2017). Therefore, we refer to the dominant Oscillatoriales genomes in each sample as *Phormidium*). Bacteroidetes were the most abundant non-cyanobacterial taxa, occurring in all 22 samples, representing 35-100% of the non-cyanobacterial assemblage (Figure 2B). Proteobacteria, primarily Burkholderiales and Sphingobacteriales, were also common in samples. Verrucomicrobia were detected in 10 samples at relative abundances approaching >40% (Figure 2B). The four CPR rpS3 clusters that occurred at low abundance were identified as Peregrinibacteria (PER), Absconditabacteria (SR1) and Parcubacteria (OD1) (Figure S2).

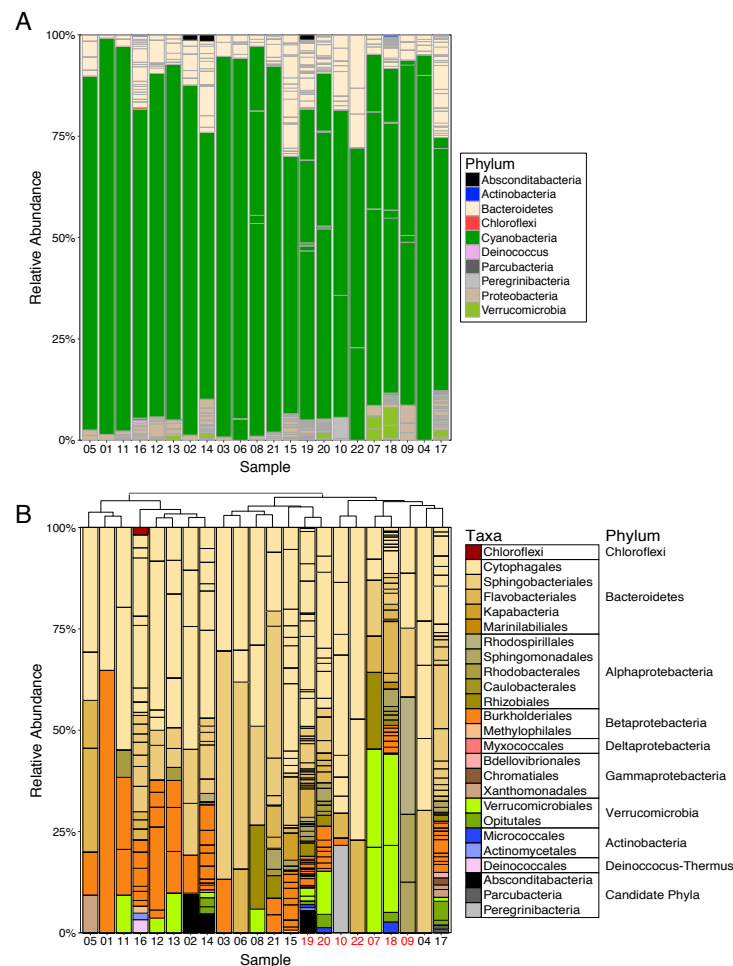

**Figure 2** Percent relative abundance of rpS3 sequence clusters in samples. A) rpS3 clusters are colored by phyla. B) Non-cyanobacterial rpS3 clusters colored at a variety of different taxonomic levels that indicate the best classification given the bin novelty. Columns are clustered by Ward's distance and samples in red indicate the recovery of the anatoxin-a gene operon in that sample.

Genomic analyses showed that each of the 22 mats was dominated by Cyanobacteria from the order Oscillatoriales, as represented by a single draft genome for a population of very closely related organisms. In 12 samples, a second or third *Phormidium* genome was also recovered at lower coverage. Interestingly, these genomes formed four *Phormidium* species clusters sharing less than 96% nucleotide identity (the species level ANI threshold) (Varghese *et al.*, 2015) among the clusters (Figure 3A). *Phormidium* species 1-3 had 82-88% ANI with reference genomes. However, *Phormidium* species 4 had 96.1% ANI with the *Phormidium willei* BDU130971 reference genome, suggesting these might be the same species. In samples with more than one recovered *Phormidium* genome, the two genomes belonged to different species, with the second genome occurring at much lower coverage (Figure 3A). Typically one or two rpS3 sequence clusters were associated with each *Phormidium* species.

With the exception of *Phormidium* species 1, *Phormidium* species were limited to sub-regions in the watershed. Species 1 contained genomes collected from sites broadly distributed across the watershed (Figures 1 and 3B), including the eastern sites 05-06 and 15-16. However, species 1 also contained a sub-cluster of samples 02 and 12-14 with 99-100% ANI, all collected within 0.5 km in a single creek. Species 2 was found in the most downstream region (samples 09, 10, and 22) and in the middle reaches of the South Fork Eel (samples 18-20). Species 3 was limited to 3 sites in the South Fork Eel (samples 07-08 and 18-20), and Species 4 came from a single site (samples 04 and 17). Each *Phormidium* species also came from a wide range of environmental conditions, with only Species 3 and 4 found in a smaller environmental niche (Figure 3B).



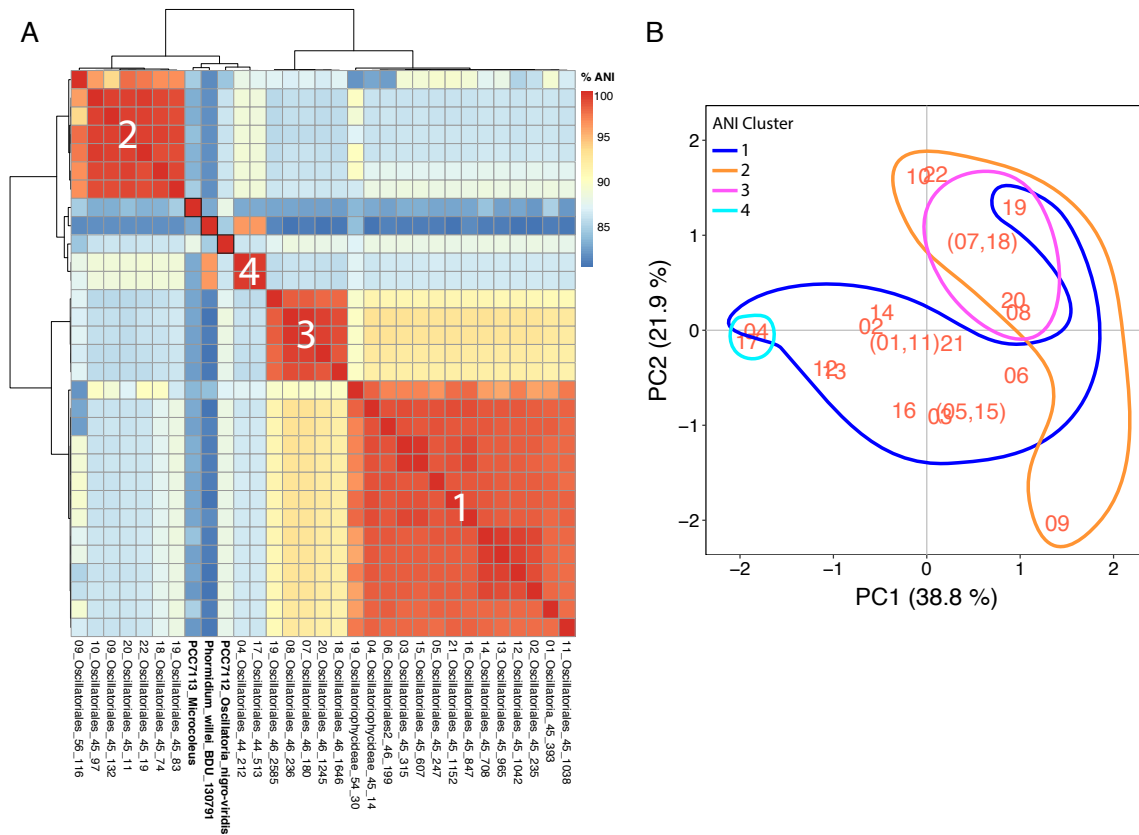

**Figure 3** A) Percent average nucleotide identity (ANI) of cyanobacterial genomes from samples and three reference genomes (in bold). The first number of the genome name identifies the sample location (See Figure 1). The latter two numbers indicate the GC content and genome coverage. ANI results were clustered using Ward's distance and represent 4 species groups with <93% ANI among the clusters. B) Principal components axes of environmental variables from Figure S1 with colored lines surrounding samples from each ANI cluster. Some samples generated genomes from multiple ANI clusters.

### Anatoxin-a

Metagenomic assembly allowed the recovery of the anatoxin-a synthesis gene operon (*anaA* a– *anaJ*) from 7 samples: 07, 09, 10, 18, 19, 20, and 22 (Figure 4A). Read mapping to the anatoxin operon in sample 19 (scaffold PH2015\_19\_scaffold\_1561) did not detect any anatoxin synthesis genes in other samples (Table S4). The non-cyanobacterial microbial assemblage was different in samples with and without the ATX operon (Figure 4C,  $p < 0.01$ ). This relationship is primarily driven by fewer Betaproteobacteria in samples without the ATX operon (Figure 4B,  $p < 0.01$ ).

LC-MS analyses detected anatoxin-a in 11 of the 19 samples (Figure 4B), with median and maximum concentrations of 153 and 1104 ng anatoxin-a / g DW, respectively. In four samples, anatoxin-a was detected with the LC-MS, but the operon was not recovered. There was no difference in the microbial assemblage among samples with and without LC-MS detection of anatoxin-a ( $p = 0.089$ ).

In all samples but 07, the operons were found in the rpS3\_152 bin and in *Phormidium* species 2 (Figures 3 and 5A). In sample 07, the operon was partially recovered from the rpS3\_85 bin in *Phormidium* species 3, with the *anaC*, J, and I genes assembled and annotated. Other scaffolds in sample 07 mapped to the PCC6506 operon, but the genes did not annotate to the assembled scaffolds at >50% identity. Most nucleotide identities of the *ana* genes to the PCC6506 reference sequence ranged from 88-94% similar with lower values in the *anaF*, G, and J genes (Table S5). Amino acid *anaC* sequences were conserved among the samples (100% identity), but other genes in the operons were more variable (*anaE*, F, G, and J; Table S5).

All anatoxin-a gene annotations from these sequences matched those previously reported (Rantala-Ylinen *et al.*, 2011; Méjean *et al.*, 2014; Jiang *et al.*, 2015; Brown *et al.*, 2016). The arrangement of the *anaB-G* genes was similar to the three reference operons (Figure 4A). However *anaA*, I, and J genes were located on the opposite end of the operon compared to PCC6506, and closer to *anaG* than the two Nostocales reference operons (*Anabaena* and *Cuspidothrix*) (Figure 4A). In samples 09 and 10, *anaJ* was not assembled, but read mapping confirmed its presence in these samples. The transposase *anaH* gene was not found in any samples. The *anaG* gene was ~1670 base pairs shorter than in the three reference sequences. This missing region contained the ~300 base pair methyltransferase domain, proposed to affect the production of either anatoxin-a or homoanatoxin-a (Méjean *et al.*, 2014, 2016). All samples also lacked the recently identified *anaK* gene, which enables production of dihydroanatoxin-a (Méjean *et al.*, 2016).

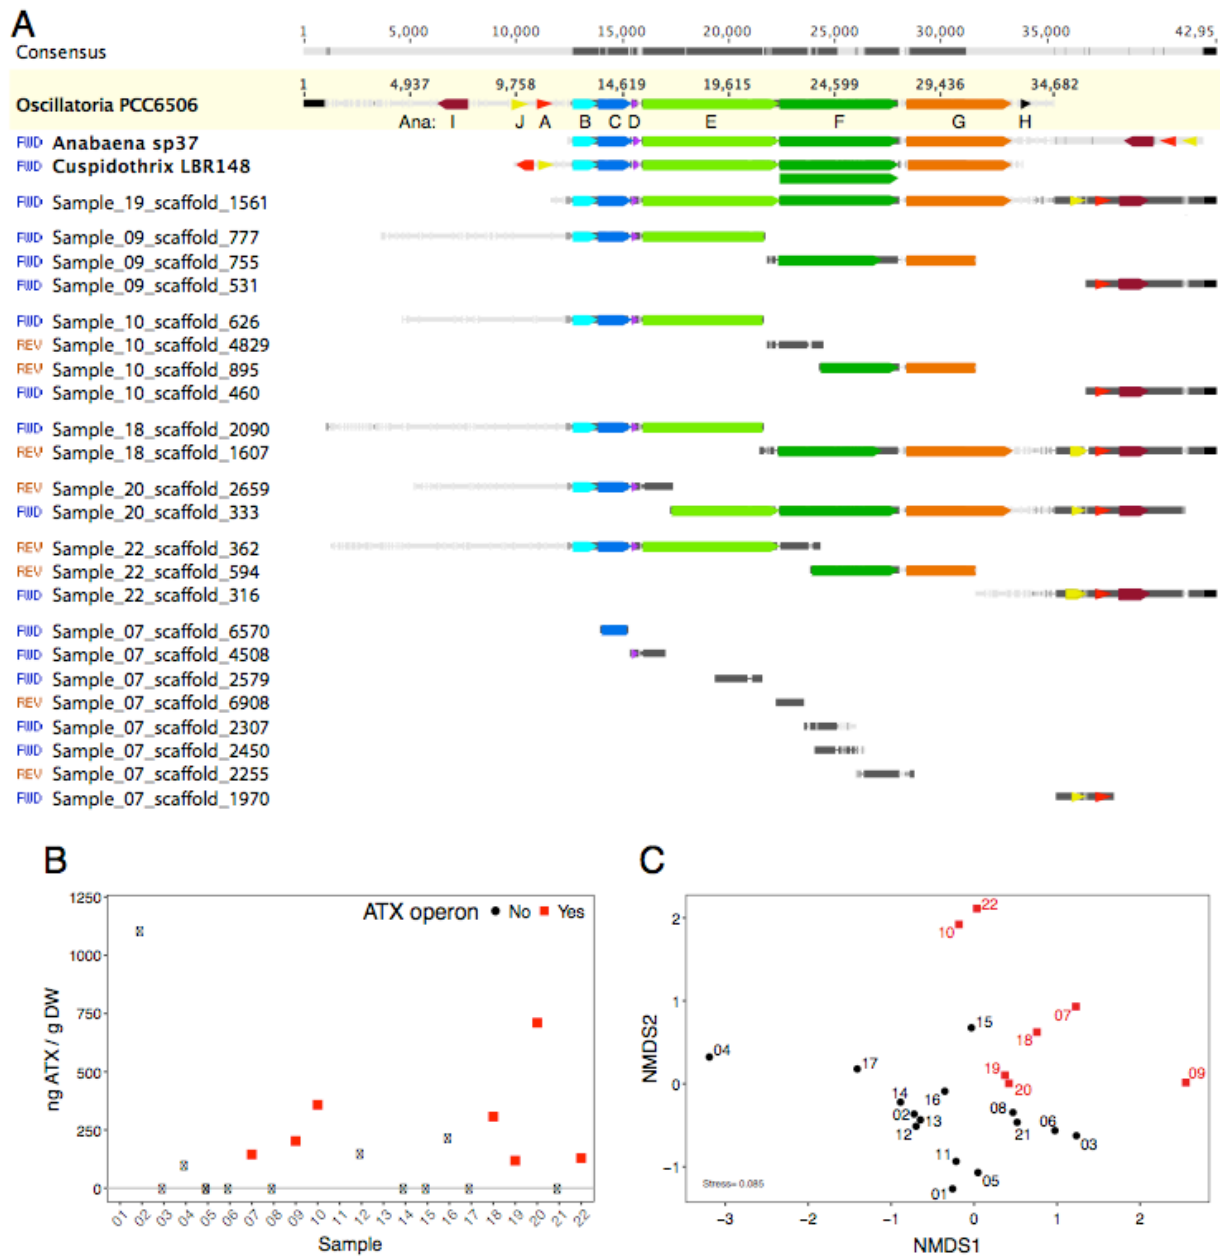

**Figure 4** A) Anatoxin-a operon from three reference sequences (bold) and samples 19, 09 10, 18, 20, 22, and 07. Sample scaffolds were mapped to *Oscillatoria* PCC6505, and gene annotations added at 50% identity to one of the 3 reference sequences. Different *ana* genes are different colors. B) Anatoxin-a (ATX) concentrations in *Phormidium* mat samples. ATX was not measured in samples 01, 11, and 13. C) Non-metric multidimensional scaling (NMDS) plot using Bray-Curtis dissimilarities of non-cyanobacterial assemblage showing samples with (red squares) and without (black circles) the anatoxin-a operon.

## *Metabolic potential and phosphorus acquisition*

Considering the entire microbial community, the most abundant metabolisms across samples were phototrophic, heterotrophic, nitrogen, and sulfur metabolisms (Figure 5). Although genes associated with nitrogen fixation, hydrogen oxidation, halogenated compounds, and formaldehyde were also detected, the most common processes were carbon fixation, oxygen respiration, nitrite reduction, utilization of urea, and sulfur oxidation. In addition to carbon fixation, *Phormidium* genomes contained genes for formaldehyde oxidation, urea breakdown, nitrite reduction, sulfur oxidation, and halogenated compounds breakdown. Across the 4 *Phormidium* species, there was little variation in metabolic potential.

Proteobacteria had the most diverse sulfur metabolic potential in the mats. Genes for sulfide oxidation (flavocytochrome c sulfide dehydrogenase), sulfur oxidation (sulfur dioxygenase), and thiosulfate oxidation (soxB, C, Y) were identified in genomes from both Alpha and Betaproteobacteria. Anoxygenic photosynthesis genes were found in a Sphingomonadales and a Rhodobacterales genome. A phylogeny of rpS3 sequences shows that the PH2015\_09\_Sphingomonadales\_65\_9 genome clusters with the freshwater aerobic anoxygenic phototrophic bacteria *Porphyrobacter* spp. and the PH2015\_13\_Rhodobacterales\_65\_6 genome with the purple non-sulfur bacteria Rhodobacterales sphaeroides and Rhodobacterales capsulatus (Figure S4). Aerobic anoxygenic phototrophic bacteria are often found in eutrophic sunlit aquatic environments and are heterotrophs that use anoxygenic photosynthesis to provide supplemental energy for cell growth and maintenance (Yurkov and Beatty, 1998; Koblizek, 2015).

Organisms in the phyla Bacteroidetes had genes for few metabolic processes. Based on analyses of 50 Bacteroidetes genomes, most genomes contain genes for carbon and sulfur oxidation (Figure 5). However, Bacteroidetes were the only organisms predicted to possess genes for oxidation of methanol to formaldehyde. Verrucomicrobia primarily have genes for carbon oxidation and nitrite reduction. Bacteria from this phylum are the only organisms found in the mats with predicted genes for chlorite reduction (Figure 5).

Phosphorus concentrations were low at most sites ( $<10 \mu\text{g L}^{-1}$ ; Table S3), and phosphorus uptake and transport genes were present in most genomes (Figure 5). The non-cyanobacterial assemblage contains genes for alkaline phosphatase, while the most common phosphorus mineralization genes for *Phormidium* were acid phosphatase *phoN* and glycerophosphodiesterase *ugpQ*. The low-affinity inorganic phosphorus transport gene (*pit*) was most frequently identified in the Cyanobacteria and Bacteroidetes genomes, but all Verrucomicrobia and most Proteobacteria lacked this gene. *Phormidium* also contained the high affinity phosphate transport *pst* genes. Unlike other phyla, Verrucomicrobia only possessed *phoA* and the *pst* transporter genes. The phosphorus-solubilization gene, *gcd*, was absent in all genomes.

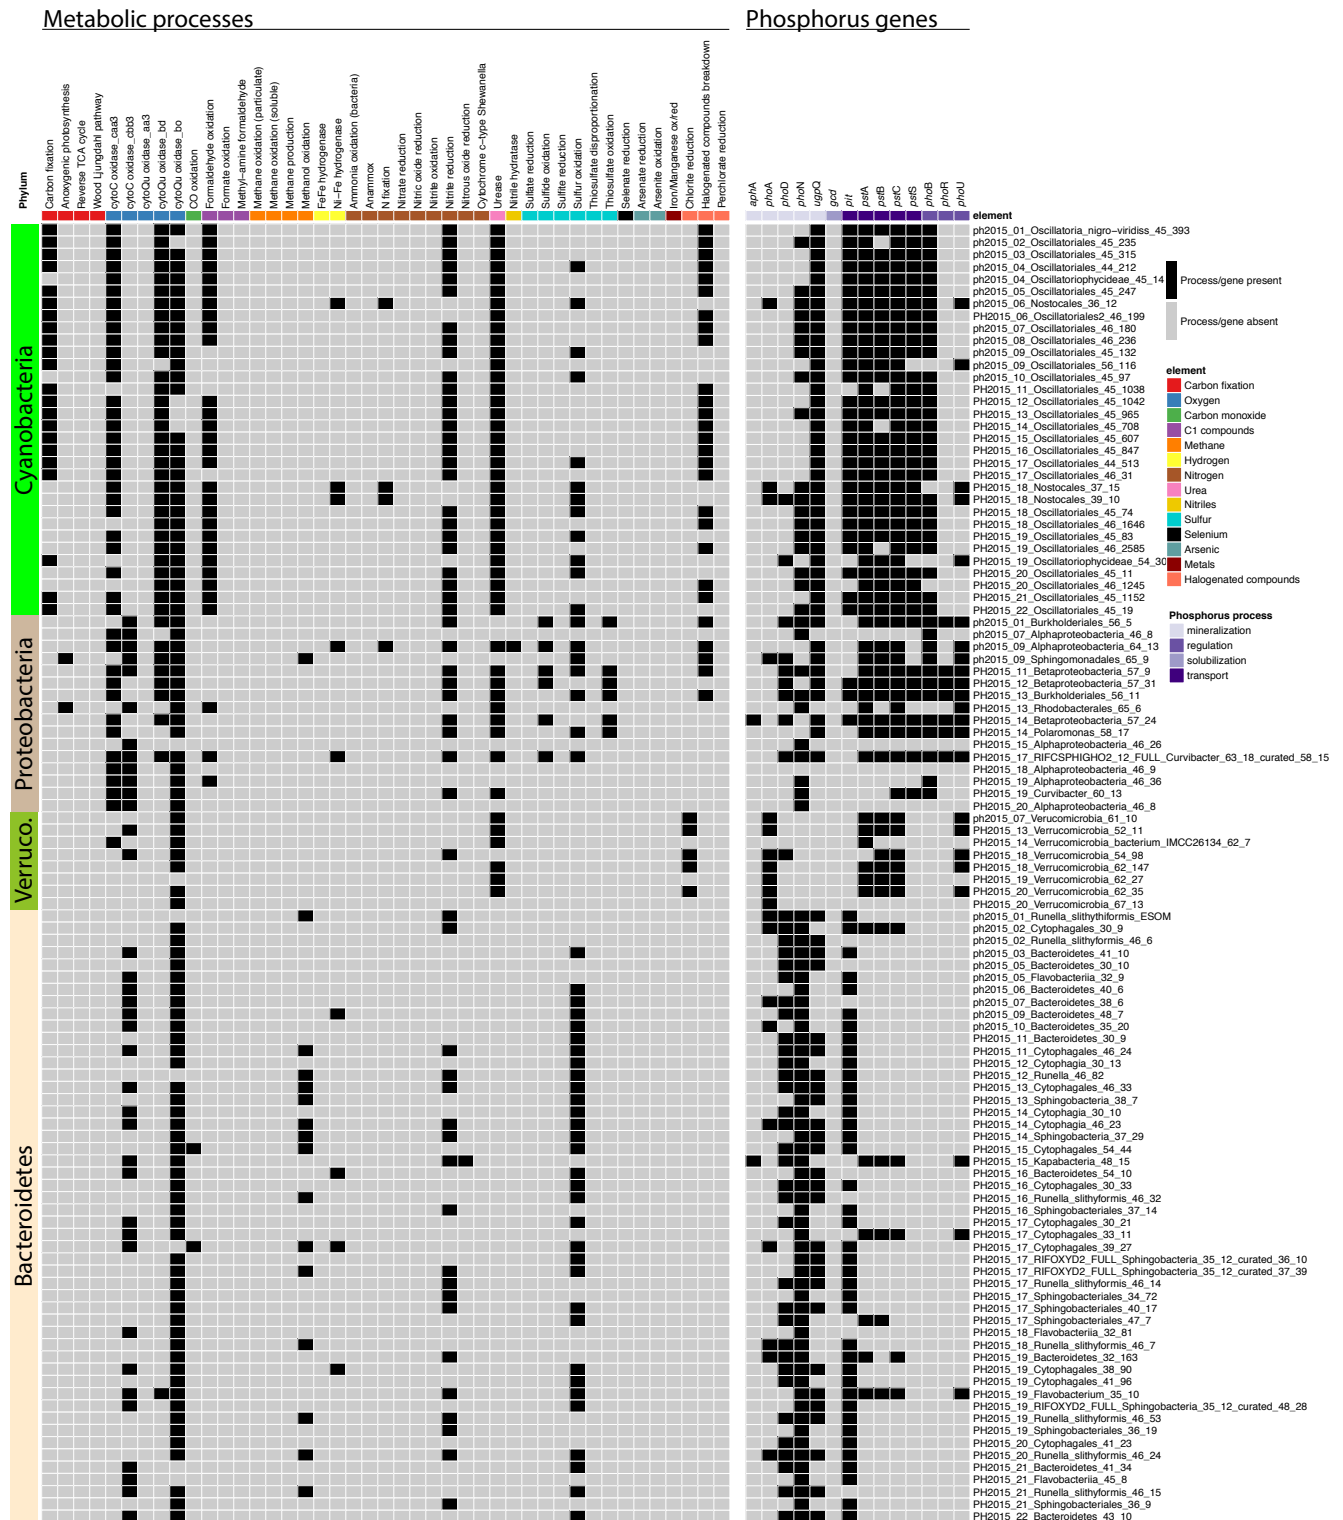

**Figure 5** Heatmap showing the presence or absence of different metabolic processes (left panel) and phosphorus acquisition and transport genes (right panel) in reconstructed genomes. Each genome is a row and the genome name is listed on the right. Each metabolic or phosphorus processes is a column. Column colors indicate different metabolism types (left panel), or genes involved in phosphorus acquisition and transport. A process or gene that is predicted in a genome is indicated by a black square. The phyla of the genomes is listed to the left of the heatmap.

## Discussion

This is the first genome-resolved metagenomic analysis of toxin-producing freshwater benthic cyanobacterial mats. By recovering the genomes of bacteria within 22 *Phormidium* mats collected across a 9547 km<sup>2</sup> watershed, we provide information about the microbes and genes potentially controlling energy flows, nutrient cycling, and toxin production within these benthic *Phormidium* mats.

### *Microbial diversity*

The dominant phyla in our samples, Cyanobacteria, Bacteroidetes, Proteobacteria, and Verrucomicrobia, have been found to co-occur with freshwater planktonic cyanobacterial blooms (Pope and Patel, 2008; Steffen *et al.*, 2012; Mou *et al.*, 2013; Louati *et al.*, 2015; Parulekar *et al.*, 2017), and were also abundant in riverine *Phormidium* mat assemblages in New Zealand (Brasell *et al.*, 2015). Prior studies of planktonic cyanobacterial blooms found a higher relative abundance of Proteobacteria, compared to Bacteroidetes, than we did in our benthic samples. In most prior studies, Alphaproteobacteria were the dominant group of Proteobacteria; only Louati *et al.* (2015) reported a higher relative abundance of Betaproteobacteria, as in our results. Increases in cyanobacterial biomass can affect microbial assemblages. As planktonic cyanobacteria blooms, or benthic *Phormidium* mats develop and thicken, the co-occurring microbial assemblage composition changes (Li *et al.*, 2012; Parveen *et al.*, 2013; Brasell *et al.*, 2015). This successional change could account for some of the variation observed within and across sites and ecosystems.

In contrast to the non-cyanobacterial species, the *Phormidium* species showed higher overlap among the sites, and environmental conditions were not strongly associated with the presence of specific groups within each sample (Figure 5). *Phormidium* species 4 was the exception, being found only in the coolest shadiest site. More sampling of smaller tributaries could test the hypothesis that *Phormidium* species 4 is a cool-water, low sunlight *Phormidium* species, while *Phormidium* species 1-3 tend to occur in warmer sunnier environments. All four assembled *Phormidium* species in this study had low sequence similarity (ANI) to reference genomes, suggesting each is a novel species. Each draft *Phormidium* genome probably represents a new species of Cyanobacteria, thus helps to fill important gaps in our understanding of cyanobacterial diversity and physiology.

### *Microbial assemblage and anatoxin-a*

The difference in the non-cyanobacterial assemblages between samples with and without the anatoxin-a operon suggests a relationship among anatoxin-a producing cyanobacteria and the non-cyanobacterial assemblage. Although it is possible that non-cyanobacterial organisms present in the environment influence selection for cyanobacterial strains, we consider the reverse more likely. As cyanobacteria bloom they will change environmental conditions, in part due to cyanobacterially-produced compounds, which then shape microbial community composition. This could involve selection for bacteria with the capacity to degrade cyanotoxins. Microcystin concentrations have been shown to affect

bacterial assemblage composition (Mou *et al.*, 2013), and the copies of microcystin degradation genes (*mlr*) in the overall community have been positively correlated with microcystin concentrations (Li *et al.*, 2015; Lezcano, 2016).

Little is known, however, about anatoxin-a degrading bacteria (Kormas and Lymperopoulou, 2013). Anatoxin-a degradation rates are increased by Bacteria in sediments (Rapala *et al.*, 1994), and a *Pseudomonas* sp. capable of degrading anatoxin-a has been isolated (Kiviranta *et al.*, 1991). Mou *et al.* (2013) found a positive association between microcystin degradation rates and Burkholderiales, suggesting a role for these bacteria in toxin breakdown. Burkholderiales are important in some cyanobacterial blooms (Louati *et al.*, 2015), although a decline in abundance of a Burkholderiales strain can be predictive of the onset of a cyanobacterial bloom (Tomas *et al.*, 2017). In the current study, samples with the anatoxin-a operon had fewer Burkholderiales, so it possible that the bacteria from this family in the Eel River mats are negatively impacted by toxin production (unfortunately, the genes for anatoxin-a degradation are not known, so this cannot be determined genomically).

With the exception of samples 9 and 10, the other sample assemblages containing Cyanobacteria with the anatoxin-a operon had relatively more Sphingomonadales, an order with many known microcystin degrading species (Kormas and Lymperopoulou, 2013; Mou *et al.*, 2013; Briand *et al.*, 2016). However, anatoxin-a and microcystin have different molecular structures. Anatoxin-a is bicyclic alkaloid, while microcystin is a cyclic peptide. It cannot be assumed that genes involved in microcystin degradation will confer the ability to degrade anatoxin-a. Our findings motivate experiments to test impacts of co-occurring microbes on anatoxin-a degradation.

### *Microbial assemblage and metabolisms*

Strong redox gradients occur in microbial mats in salt marshes, lakes and mudflats and result in diverse spatially structured metabolisms (Armitage *et al.*, 2012; Franks and Stolz, 2009). Although the epilithic *Phormidium* mats from this study clearly derive their energy from photosynthesis and carbon oxidation in an aerobic environment, a small fraction of bacteria in the assemblages appear to derive energy using other metabolic pathways. However, the epilithic growth on larger cobbles, compared to sand or silt substrates, limits the depth of the mat and likely prevents development of the permanent anoxic regions found in cyanobacterial dominated mats in estuaries (Franks and Stolz, 2009). Within the Eel River mats, oxygen concentrations likely fluctuate on a diel cycle as they do in New Zealand (Wood *et al.*, 2015), creating transient anoxic conditions (Paerl and Pinckney, 1996) and limiting the relative abundance of organisms with anaerobic metabolisms. Overall, the mats studied here are metabolically simple, with few anaerobic or non-carbon metabolisms. This simplifies predictions about the environments in the river network in which mats may proliferate.

Genes for carbon respiration were common among reconstructed genomes from the mats, especially within Bacteroidetes genomes, the most abundant non-cyanobacteria in

most samples. Bacteria from this phylum are sometimes heterotrophs, capable of breaking down complex organic compounds (Grondin *et al.*, 2017). Consistent with this prediction, many of the genomes encode large inventories of genes for degradation of complex carbohydrates (e.g., diverse glycosyl hydrolases). *Phormidium* mats are characterized by thick extracellular polymeric substances (EPS) that give structural integrity to the mat (Nicolaus *et al.*, 1999). Therefore, it is likely that Bacteroidetes are metabolizing carbon compounds associated with the EPS produced by *Phormidium*, (Beraldi-Campesi *et al.*, 2012).

Bacteroidetes were the only bacteria predicted to possess methanol oxidation genes, which oxidize methanol to formaldehyde. It is possible that some Bacteroidetes supply formaldehyde for *Phormidium* to metabolize to formate. This further suggests a close carbon association of Bacteroidetes with *Phormidium*, as most *Phormidium* genomes contain formaldehyde oxidation genes. However, as no formate metabolism genes were found, so the fate of formate is unclear.

Consistent with prior studies (Niemi *et al.*, 2009), Burkholderiales are predicted to have some capacity to degrade complex organic compounds. This may also explain their high abundance in mats. CPR bacteria may also contribute to carbon cycling. As noted previously (e.g., Kantor *et al.*, 2013; Nelson and Stegen, 2015), the genomes of the bacteria from the three CPR groups are small and the organisms are predicted to have symbiotic anaerobic, fermentation-based lifestyles. Parcubacteria have been reported in planktonic cyanobacterial blooms (Parulekar *et al.*, 2017), Doudnabacteria (SM2F11), and 12 other Candidate Phyla reported in Antarctic Cyanobacteria/diatom mats (Stanish *et al.*, 2013), and Absconditabacteria (SR1) reported from various anaerobic aquatic habitats (Davis *et al.*, 2009). Their identification in mats in a river network suggests that they play important and previously unrecognized roles in aquatic biofilms, both via carbon turnover and impacts on host organisms.

Many Cyanobacteria and Proteobacteria contain genes for sulfur and sulfide oxidation, both of which can occur in oxygenated environments, but often in proximity to anoxic regions where reduced sulfur compounds are formed or accumulate (Wasmund *et al.*, 2017). However, most rivers do not have high concentrations of elemental or reduced sulfur in the water column (Meybeck, 1993). Therefore, it is likely that these organisms are not using sulfur as a primary energy source, but are capable of metabolizing sulfur opportunistically when it may sporadically accumulate in anoxic microhabitats in the mats.

In the Eel River, nitrogen is considered a limiting nutrient in spring and early summer (Hill and Knight, 1988; Finlay *et al.*, 2011). For example, epilithic periphyton assemblages are often dominated by nitrogen fixing taxa (Power *et al.*, 2009), such as endosymbiotic nitrogen fixing cyanobacteria associated with Rhopalodiaceae diatoms, *Nostoc* spp., or *Anabaena* spp. However, few nitrogen fixation genes were predicted in the dataset analyzed here. Though some *Phormidium* species can fix nitrogen (Bergman *et al.*, 1997), as expected based on samples in New Zealand (Heath *et al.*, 2016), the *Phormidium* in Eel



River mats do not fix nitrogen. Nitrogen fixing capacity was found in a single Alphaproteobacteria genome and three Nostocales genomes. *Phormidium* and most other bacteria in the Eel River mats likely derive their nitrogen exogenously from a combination of the water column and Rhopalodiaceae diatoms and the few nitrogen fixing bacteria living in the mats.

All *Phormidium* genomes, and most Proteobacteria and Verrucomicrobia genomes, are predicted to contain urease genes. Dissolved organic nitrogen is hypothesized to be an important nitrogen source in the summer in the Eel River (Finlay *et al.*, 2011). Urease genes may also suggest high rates of nitrogen cycling within mats, as organic nitrogenous waste products from organisms are taken up by other organisms. Therefore, once mats establish, internal cycling of organic nitrogen may decouple the mats from nitrogen dynamics in the overlying water column (Vadeboncoeur and Power, 2017).

*Phormidium* mats proliferate in New Zealand rivers at low dissolved phosphorus concentrations (McAllister *et al.*, 2016; Wood *et al.*, 2017), and phosphorus may become increasing limiting in the Eel River in late summer (Finlay *et al.*, 2011), when *Phormidium* mats are more commonly observed. Based on our genomic analyses, many of the organisms in the microbial assemblage likely contribute to phosphorus mineralization in mats. The pH levels within *Phormidium* mats in New Zealand oscillate daily due to changes in CO<sub>2</sub> and O<sub>2</sub> concentrations driven by cyanobacterial photosynthesis (Wood *et al.*, 2015). *Phormidium* may use acid phosphatases to scavenge phosphorus at night when pH levels drop, and non-cyanobacteria use alkaline phosphatases scavenge during the day when pH is elevated. In New Zealand, phosphate weakly sorbed onto sediments trapped in mats may be an important phosphorus source to *Phormidium* mats (Wood *et al.*, 2015). The lack of the solubilization *gcd* gene suggests that microbes are relying on pH and O<sub>2</sub> gradients rather than extracellular enzymes to solubilize sorbed phosphorus. *Phormidium*, and some Proteobacteria, also contain the transporter *pst* genes, which are up-regulated at low inorganic phosphorus concentrations (Hirota *et al.*, 2010). The presence of phosphatase genes and *pst* transporter genes may enable *Phormidium* strains to outcompete other organisms for phosphorus and enable them to dominate periphyton assemblages at low phosphorus concentrations.

## Conclusion

*De novo* genome assembly of metagenomic datasets provided information about the community membership of *Phormidium*-dominated cyanobacterial mats in a river network and the metabolic capacities of the abundant Bacteria. Thus, it was possible to describe likely ecological exchanges of nutrients and energy in these mats. Similar to planktonic cyanobacterial blooms, but in contrast to laminated cyanobacterial mats on finer substrates, riverine mat metabolisms are primarily fueled by phototrophy and carbon degradation. Importantly, we directly identified the genes for cyanotoxin production and community compositional features that may predict the presence of this capacity. As humans put more pressure on water resources, through water extraction, nutrient

pollution, and warming temperatures, cyanobacterial blooms are predicted to have increasing impacts on freshwater resources (Paerl *et al.*, 2011; Taranu *et al.*, 2015; Monteagudo and Moreno, 2016). Understanding the relationships among toxigenic cyanobacteria and abiotic and biotic factors will be necessary to predict or mitigate cyanobacterial blooms in the future.

## **Acknowledgements**

Housing and laboratory facilities were provided by the UCNRS Angelo Coast Range Reserve. We would like to thank the Reserve Manager, Peter Steel, for his assistance. Addien Wray, Natalie Soto, Lindsey Bouma-Gregson, and Brian and Wendy Gregson assisted with sample collection in the field. Sue Spalding offered DNA extraction guidance, and Arianna Nuri assisted with DNA extractions and other lab work. We thank Raphael Kudela for measuring anatoxin-a concentrations. Support was provided by the National Science Foundation's Eel River Critical Zone Observatory [EAR-1331940] and a Department of Energy grant [DOE-SC10010566]. KBG was supported by a US Environmental Protection Agency STAR Fellowship [91767101-0]. AJP was supported by the German Science Foundation [DFG PR 1603/1-1]. This work used the Vincent J. Coates Genomics Sequencing Laboratory at UC Berkeley, supported by an NIH Instrumentation Grant [S10 OD018174].

## References

- Allen MB. (1952). The Cultivation of Myxophyceae. *Arch Microbiol* **53**: 34–53.
- Armitage DW, Gallagher KL, Youngblut ND, Buckley DH, Zinder SH. (2012). Millimeter-scale patterns of phylogenetic and trait diversity in a salt marsh microbial mat. *Front Microbiol* **3**: 1–16.
- Bagatini IL, Eiler A, Bertilsson S, Klaveness D, Tessarolli P, Vieira AAH. (2014). Host-specificity and dynamics in bacterial communities associated with bloom-forming Freshwater Phytoplankton. *PLoS One* **9**: e85950.
- Beraldi-Campesi H, Arenas-Abad C, Garcia-Pichel F, Arellano-Aguilar O, Auqué L, Vázquez-Urbez M, *et al.* (2012). Benthic bacterial diversity from freshwater tufas of the Iberian Range (Spain). *FEMS Microbiol Ecol* **80**: 363–379.
- Berg KA, Lyra C, Sivonen K, Paulin L, Suomalainen S, Tuomi P, *et al.* (2009). High diversity of cultivable heterotrophic bacteria in association with cyanobacterial water blooms. *ISME J* **3**: 314–25.
- Bergman B, Gallon JR, Rai AN, Stal LJ. (1997). N<sub>2</sub> Fixation by non-heterocystous cyanobacteria. *FEMS Microbiol Rev* **19**: 139–185.
- Bouma-Gregson K, Power ME, Bormans M. (2017). Rise and fall of toxic benthic freshwater cyanobacteria (*Anabaena* spp.) in the Eel river: Buoyancy and dispersal. *Harmful Algae* **66**: 79–87.
- Brasell KA, Heath MW, Ryan KG, Wood SA. (2015). Successional change in microbial communities of benthic Phormidium-dominated biofilms. *Microb Ecol* **69**: 254–266.
- Briand E, Humbert J, Tambosco K, Bormans M, Gerwick WH. (2016). Role of bacteria in the production and degradation of Microcystis cyanopeptides. *Microbiologyopen* **5**: 469–478.
- Brown NM, Mueller RS, Shepardson JW, Landry ZC, Morré JT, Maier CS, *et al.* (2016). Structural and functional analysis of the finished genome of the recently isolated toxic *Anabaena* sp. WA102. *BMC Genomics* **17**: 457.
- Cadel-Six S, Itean I, Peyraud-Thomas C, Mann S, Ploux O, Méjean A. (2009). Identification of a polyketide synthase coding sequence specific for anatoxin-a-producing *Oscillatoria* cyanobacteria. *Appl Environ Microbiol* **75**: 4909–4912.
- Cantoral Uriza E, Asencio A, Aboal M. (2017). Are we underestimating benthic cyanotoxins? Extensive sampling results from Spain. *Toxins (Basel)* **9**: 385.
- Carmichael WW, Biggs DF, Peterson MA. (1979). Pharmacology of anatoxin-a, produced by the freshwater cyanophyte *Anabaena flos-aquae* NRC-44-1. *Toxicon* **17**: 229–236.
- Davis JP, Youssef NH, Elshahed MS. (2009). Assessment of the diversity, abundance, and ecological distribution of members of candidate division SR1 reveals a high level of phylogenetic diversity but limited morphotypic diversity. *Appl Environ Microbiol* **75**: 4139–48.

- Devlin J, Edwards O. (1977). Anatoxin-a, a toxic alkaloid from *Anabaena flos-aquae* NRC-44h. *Can J Chem* **1**–5.
- Edgar RC. (2010). Search and clustering orders of magnitude faster than BLAST. *Bioinformatics* **26**: 2460–2461.
- Fetscher AE, Howard MDA, Stancheva R, Kudela RM, Stein ED, Sutula MA, *et al.* (2015). Wadeable streams as widespread sources of benthic cyanotoxins in California, USA. *Harmful Algae* **49**: 105–116.
- Finlay JC, Hood JM, Limm MP, Power ME, Schade JD, Welter JR. (2011). Light-mediated thresholds in stream-water nutrient composition in a river network. *Ecology* **92**: 140–50.
- Francis G. (1878). Poisonous Australian lake. *Nature* **18**: 11–12.
- Franks J, Stolz JF. (2009). Flat laminated microbial mat communities. *Earth-Science Rev* **96**: 163–172.
- Grondin JM, Tamura K, Déjean G, Abbott DW, Brumer H. (2017). Polysaccharide utilization loci: fueling microbial communities. *J Bacteriol* **199**: e00860-16.
- Gugger M, Lenoir S, Berger C, Ledreux A, Druart J-C, Humbert J-F, *et al.* (2005). First report in a river in France of the benthic cyanobacterium *Phormidium favosum* producing anatoxin-a associated with dog neurotoxicosis. *Toxicon* **45**: 919–28.
- Heath M, Wood SA, Young RG, Ryan KG. (2016). The role of nitrogen and phosphorus in regulating *Phormidium* sp. (Cyanobacteria) growth and anatoxin production. *FEMS Microbiol Ecol* **92**: fiw021.
- Hill WR, Knight AW. (1988). Nutrient and light limitation of algae in two Northern California streams. *J Phycol* **24**: 125–132.
- Hirota R, Kuroda A, Kato J, Ohtake H. (2010). Bacterial phosphate metabolism and its application to phosphorus recovery and industrial bioprocesses. *J Biosci Bioeng* **109**: 423–432.
- Hyatt D, Chen G-L, Locascio PF, Land ML, Larimer FW, Hauser LJ. (2010). Prodigal: prokaryotic gene recognition and translation initiation site identification. *BMC Bioinformatics* **11**: 119.
- Jiang Y, Song G, Pan Q, Yang Y, Li R. (2015). Identification of genes for anatoxin-a biosynthesis in *Cuspidothrix issatschenkoi*. *Harmful Algae* **46**: 43–48.
- Kanehisa M, Goto S, Sato Y, Kawashima M, Furumichi M, Tanabe M. (2014). Data, information, knowledge and principle: Back to metabolism in KEGG. *Nucleic Acids Res* **42**: 199–205.
- Kantor RS, Wrighton KC, Handley KM, Sharon I, Hug LA, Castelle CJ, *et al.* (2013). Small genomes and sparse metabolisms of sediment-associated bacteria from four candidate phyla. *MBio* **4**: 1–11.
- Kiviranta J, Sivonen K, Lahti K, Luukkainen R, Niemelae SI. (1991). Production and biodegradation of cyanobacterial toxins- A laboratory study. *Arch Fur Hydrobiol* **121**: 281–294.

- Koblizek M. (2015). Ecology of aerobic anoxygenic phototrophs in aquatic environments. *FEMS Microbiol Rev* **39**: 854–870.
- Komárek J. (2017). Delimitation of the family Oscillatoriaceae (Cyanobacteria) according to the modern polyphasic approach (introductory review). *Brazilian J Bot* 1–8.
- Kormas KA, Lympelopoulou DS. (2013). Cyanobacterial toxin degrading bacteria: who are they? *Biomed Res Int* **2013**: 463894.
- Lezcano MA. (2016). Presence or Absence of mlr genes and nutrient concentrations co-determine the microcystin biodegradation efficiency of a natural bacterial community. *Toxins (Basel)* **8**: 1–17.
- Li H, Xing P, Wu QL. (2012). The high resilience of the bacterioplankton community in the face of a catastrophic disturbance by a heavy *Microcystis* bloom. *FEMS Microbiol Ecol* **82**: 192–201.
- Li J, Shimizu K, Akasako H, Lu Z, Akiyama S, Goto M, *et al.* (2015). Assessment of the factors contributing to the variations in microcystins biodegradability of the biofilms on a practical biological treatment facility. *Bioresour Technol* **175**: 463–472.
- Louati I, Pascault N, Debroas D, Bernard C, Humbert JF, Leloup J. (2015). Structural diversity of bacterial communities associated with bloom-forming freshwater cyanobacteria differs according to the cyanobacterial genus. *PLoS One* **10**. e-pub ahead of print, doi: 10.1371/journal.pone.0140614.
- McAllister TG, Wood SA, Hawes I. (2016). The rise of toxic benthic *Phormidium* proliferations: A review of their taxonomy, distribution, toxin content and factors regulating prevalence and increased severity. *Harmful Algae* **55**: 282–294.
- Méjean A, Dalle K, Paci G, Bouchonnet S, Mann S, Pichon V, *et al.* (2016). Dihydroanatoxin-a is biosynthesized from proline in *Cylindrospermum stagnale* PCC 7417: isotopic incorporation experiments and mass spectrometry analysis. *J Nat Prod* **79**: 1775–1782.
- Méjean A, Mazmouz R, Mann S, Calteau A, Médigue C, Ploux O. (2010). The genome sequence of the cyanobacterium *Oscillatoria* sp. PCC 6506 reveals several gene clusters responsible for the biosynthesis of toxins and secondary metabolites. *J Bacteriol* **192**: 5264–5265.
- Méjean A, Paci G, Gautier V, Ploux O. (2014). Biosynthesis of anatoxin-a and analogues (anatoxins) in cyanobacteria. *Toxicon* **91**: 15–22.
- Meybeck M. (1993). C, N, P and S in rivers: from sources to global inputs. In: R. W, F.T. M, L. C (eds) Vol. 4. *Interactions of C, N, P and S Biogeochemical Cycles and Global Change*. NATO ASI Series (Series I: Global Environmental Change). Springer Berlin Heidelberg, pp 163–193.
- Monteagudo L, Moreno JL. (2016). Benthic freshwater cyanobacteria as indicators of anthropogenic pressures. In: Vol. 67. *Ecological Indicators*. Elsevier Ltd, pp 693–702.
- Mou X, Lu X, Jacob J, Sun S, Heath R. (2013). Metagenomic identification of bacterioplankton taxa and pathways involved in microcystin degradation in Lake Erie.

*PLoS One* **8**: e61890.

Nelson WC, Stegen JC. (2015). The reduced genomes of Parcubacteria (OD1) contain signatures of a symbiotic lifestyle. *Front Microbiol* **6**: 1–14.

Nicolaus B, Panico A, Lama L, Romano I, Manca MC, De Guilio A, *et al.* (1999). Chemical composition and production of exopolysaccharides from representative members of heterocystous and non-heterocystous cyanobacteria. *Phytochemistry* **52**: 639–647.

Niemi RM, Heiskanen I, Heine R, Rapala J. (2009). Previously uncultured  $\beta$ -Proteobacteria dominate in biologically active granular activated carbon (BAC) filters. *Water Res* **43**: 5075–5086.

Oksanen J, Blanchet FG, Friendly M, Kindt R, Legendre P, McGlinn D, *et al.* (2017). vegan: Community Ecology Package.

Paerl HW. (1996). Microscale physiological and ecological studies of aquatic cyanobacteria: Macroscale implications. *Microsc Res Tech* **33**: 47–72.

Paerl HW, Hall NS, Calandrino ES. (2011). Controlling harmful cyanobacterial blooms in a world experiencing anthropogenic and climatic-induced change. *Sci Total Environ* **409**: 1739–45.

Paerl HW, Huisman J. (2009). Climate change: a catalyst for global expansion of harmful cyanobacterial blooms. *Environ Microbiol Rep* **1**: 27–37.

Paerl HW, Pinckney JL. (1996). A mini-review of microbial consortia: their roles in aquatic production and biogeochemical cycling. *Microb Ecol* **31**: 225–247.

Pancrace C, Barny M-A, Ueoka R, Calteau A, Scalvenzi T, Pédrón J, *et al.* (2017). Insights into the *Planktothrix* genus: Genomic and metabolic comparison of benthic and planktic strains. *Sci Rep* **7**: 41181.

Parks DH, Imelfort M, Skennerton CT, Hugenholtz P, Tyson GW. (2015). CheckM: assessing the quality of microbial genomes recovered from isolates, single cells, and metagenomes. *Genome Res* **25**: 1043–55.

Parulekar NN, Kolekar P, Jenkins A, Kleiven S, Utkilen H, Johansen A, *et al.* (2017). Characterization of bacterial community associated with phytoplankton bloom in a eutrophic lake in South Norway using 16S rRNA gene amplicon sequence analysis. *PLoS One* **12**: e0173408.

Parveen B, Ravet V, Djediat C, Mary I, Quiblier C, Debroas D, *et al.* (2013). Bacterial communities associated with *Microcystis* colonies differ from free-living communities living in the same ecosystem. *Environ Microbiol Rep* **5**: 716–724.

Peng Y, Leung HCM, Yiu SM, Chin FYL. (2012). IDBA-UD: A de novo assembler for single-cell and metagenomic sequencing data with highly uneven depth. *Bioinformatics* **28**: 1420–1428.

Pope PB, Patel BKC. (2008). Metagenomic analysis of a freshwater toxic cyanobacteria bloom. *FEMS Microbiol Ecol* **64**: 9–27.

Power ME, Lowe RL, Furey PC, Welter JR, Limm MP, Finlay JC, *et al.* (2009). Algal mats

and insect emergence in rivers under Mediterranean climates: towards photogrammetric surveillance. *Freshw Biol* **54**: 2101–2115.

Puschner B, Hoff B, Tor ER. (2008). Diagnosis of anatoxin-a poisoning in dogs from North America. *J Vet Diagnostic Investig* **20**: 89–92.

Quiblier C, Wood S, Echenique-Subiabre I, Heath M, Villeneuve A, Humbert J-F. (2013). A review of current knowledge on toxic benthic freshwater cyanobacteria - Ecology, toxin production and risk management. *Water Res* **47**: 5464–5479.

R Core Team. (2017). R: a language and environment for statistical computing. *R Found Stat Comput* <http://www.r-project.org>.

Rantala-Ylinen A, Känä S, Wang H, Rouhiainen L, Wahlsten M, Rizzi E, *et al.* (2011). Anatoxin-a synthetase gene cluster of the cyanobacterium *Anabaena* sp. strain 37 and molecular methods to detect potential producers. *Appl Environ Microbiol* **77**: 7271–8.

Rapala J, Lahti K, Sivonen K, Niemelä SI. (1994). Biodegradability and adsorption on lake sediments of cyanobacterial hepatotoxins and anatoxin-a. *Lett Appl Microbiol* **19**: 423–428.

Raveh-Sadka T, Thomas BC, Singh A, Firek B, Brooks B, Castelle CJ, *et al.* (2015). Gut bacteria are rarely shared by co-hospitalized premature infants, regardless of necrotizing enterocolitis development. *Elife* **2015**: e05477.

Rigosi A, Carey CC, Ibelings BW, Brookes JD. (2014). The interaction between climate warming and eutrophication to promote cyanobacteria is dependent on trophic state and varies among taxa. *Limnol Oceanogr* **59**: 99–114.

Shih PM, Wu D, Latifi A, Axen SD, Fewer DP, Talla E, *et al.* (2013). Improving the coverage of the cyanobacterial phylum using diversity-driven genome sequencing. *Proc Natl Acad Sci U S A* **110**: 1053–8.

Stanish LF, O'Neill SP, Gonzalez A, Legg TM, Knelman J, Mcknight DM, *et al.* (2013). Bacteria and diatom co-occurrence patterns in microbial mats from polar desert streams. *Environ Microbiol* **15**: 1115–1131.

Steffen MM, Li Z, Effler TC, Hauser LJ, Boyer GL, Wilhelm SW. (2012). Comparative metagenomics of toxic freshwater cyanobacteria bloom communities on two continents. *PLoS One* **7**: e44002.

Strunecký O, Komárek J, Johansen J, Lukešová A, Elster J. (2013). Molecular and morphological criteria for revision of the genus *Microcoleus* (Oscillatoriales, Cyanobacteria). *J Phycol* **49**: 1167–1180.

Suzek BE, Huang H, McGarvey P, Mazumder R, Wu CH. (2007). UniRef: comprehensive and non-redundant UniProt reference clusters. *Bioinformatics* **23**: 1282–1288.

Taranu ZE, Gregory-Eaves I, Leavitt PR, Bunting L, Buchaca T, Catalan J, *et al.* (2015). Acceleration of cyanobacterial dominance in north temperate-subarctic lakes during the Anthropocene. *Ecol Lett* **18**: 375–384.

Tromas N, Fortin N, Bedrani L, Terrat Y, Cardoso P, Bird D, *et al.* (2017). Characterising

and predicting cyanobacterial blooms in an 8-year amplicon sequencing time course. *ISME J* **11**: 1746–1763.

Vadeboncoeur Y, Power ME. (2017). Attached algae: the cryptic base of inverted trophic pyramids in freshwaters. *Annu Rev Ecol Evol Syst* **48**: 255–279.

Varghese NJ, Mukherjee S, Ivanova N, Konstantinidis KT, Mavrommatis K, Kyrpides NC, *et al.* (2015). Microbial species delineation using whole genome sequences. *Nucleic Acids Res* **43**: 6761–6771.

Wasmund K, Mußmann M, Loy A. (2017). The life sulfuric: microbial ecology of sulfur cycling in marine sediments. *Environ Microbiol Rep* **9**: 323–344.

Wood SA, Atalah J, Wagenhoff A, Brown L, Doehring K, Young RG, *et al.* (2017). Effect of river flow, temperature, and water chemistry on proliferations of the benthic anatoxin-producing cyanobacterium *Phormidium*. *Freshw Sci* **36**: 63–76.

Wood SA, Depree C, Brown L, McAllister T, Hawes I. (2015). Entrapped sediments as a source of phosphorus in epilithic cyanobacterial proliferations in low nutrient rivers. *PLoS One* **10**: e0141063.

Wood SA, Puddick J. (2017). The abundance of toxic genotypes is a key contributor to anatoxin variability in *Phormidium*-dominated benthic mats. *Mar Drugs* **15**: 307.

Wood SA, Smith FMJ, Heath MW, Palfroy T, Gaw S, Young RG, *et al.* (2012). Within-mat variability in anatoxin-a and homoanatoxin-a production among benthic *Phormidium* (cyanobacteria) strains. *Toxins (Basel)* **4**: 900–12.

Woodhouse JN, Kinsela AS, Collins RN, Bowling LC, Honeyman GL, Holliday JK, *et al.* (2016). Microbial communities reflect temporal changes in cyanobacterial composition in a shallow ephemeral freshwater lake. *ISME J* **10**: 1337–1351.

Xie M, Ren M, Yang C, Yi H, Li Z, Li T, *et al.* (2016). Metagenomic analysis reveals symbiotic relationship among bacteria in *Microcystis*-dominated community. *Front Microbiol* **7**: 1–10.

Yurkov V V, Beatty JT. (1998). Aerobic anoxygenic phototrophic bacteria. *Microbiol Mol Biol Rev* **62**: 695–724.
